# Supplementary material for: Ribosome biogenesis during cell cycle arrest fuels EMT in development and disease
Source: PubMed Central journal article supplement (PMC6506521; doi:10.1038/s41467-019-10100-8), 2019-05-08
Supplement: 41467_2019_10100_MOESM1_ESM.pdf [file 41467_2019_10100_MOESM1_ESM.pdf]

## **Supplementary Information**

**Ribosome biogenesis during cell cycle arrest fuels EMT in development and disease**

Prakash et al.

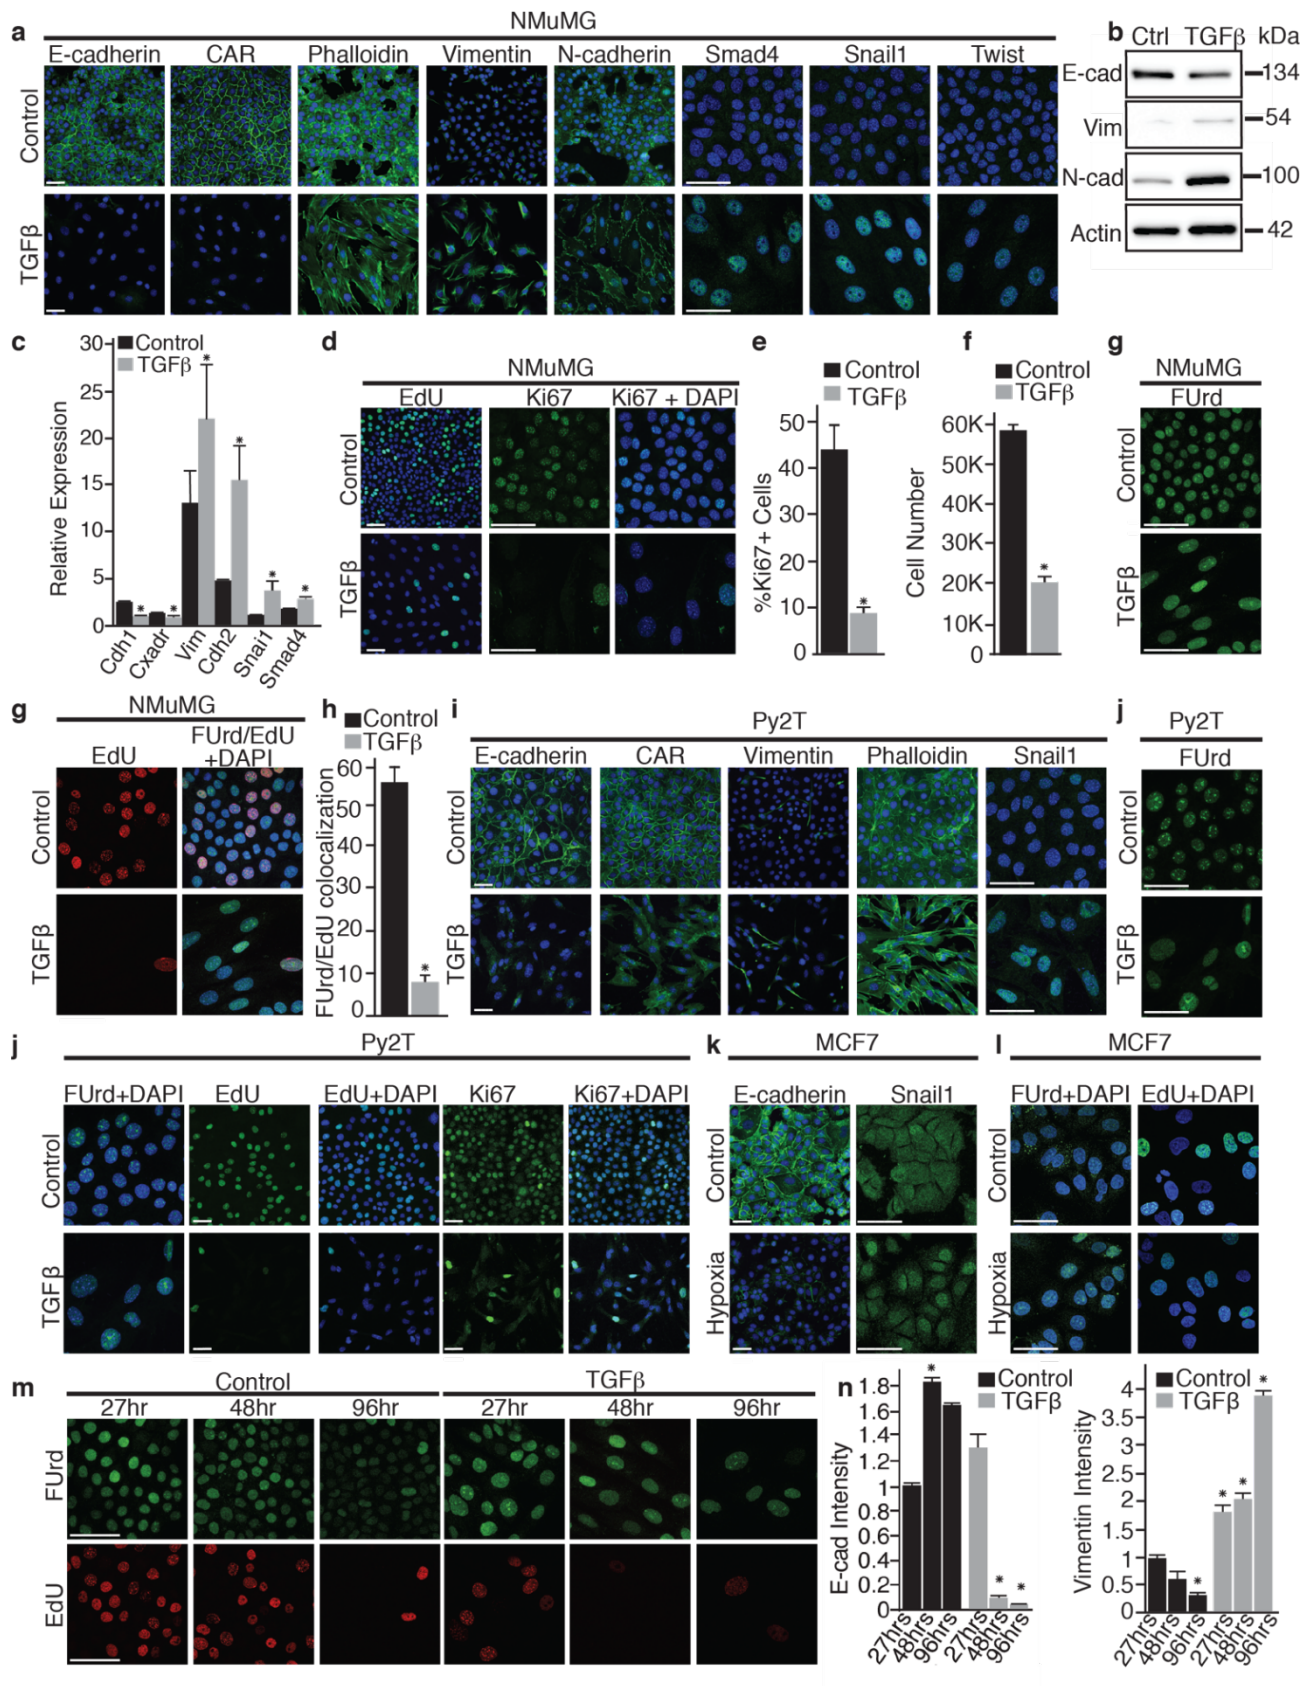

Supplementary Figure 1. Enhanced rRNA synthesis in EMT is independent of cell proliferation. **a**,

Immunostaining of E-cadherin, CAR, Phalloidin, Vimentin, N-cadherin, Smad4, Snail1, and Twist (green) in proliferating (Control) cells and after 48 hours of TGF $\beta$  treatment (TGF $\beta$ ), merged with DAPI (blue). **b**, E-cadherin (E-cad), Vimentin (Vim) and N-cadherin (N-cad) western blot  $\pm$  TGF $\beta$  in NMuMG cells. Actin serves as a loading control. **c**, qRT-PCR of E-cadherin (Cdh1), CAR (Cxadr), Vimentin (Vim), N-cadherin (Cdh2), Snail1 (Snai1) and Smad4  $\pm$  TGF $\beta$  in NMuMG cells,  $P < 0.02$ . Error bars  $\pm$  SD  $n = 3$ . **d**, Immunostaining of EdU (green) and Ki67 (green)  $\pm$  TGF $\beta$ , NMuMG cells, DAPI (blue). **e**, Quantification of Ki67<sup>+</sup> cells,  $P < 0.001$ . Error bars  $\pm$  SE,  $n = 3$ . **f**, Quantification of NMuMG cell number  $\pm$  48 hour TGF $\beta$  treatment,  $P < 0.001$ . Error bars  $\pm$  SD,  $n = 3$ . **g**, Co-localization of FURd, (green) and EdU<sup>+</sup>, (red)  $\pm$  TGF $\beta$ , merged with DAPI (blue). **h**, Quantification of FURd/EdU co-localization in (**g**),  $P < 0.001$ . Error bars  $\pm$  SE,  $n = 3$ . **i**, Immunostaining of E-cadherin, CAR, Vimentin, Phalloidin, and Snail1 (all green) in proliferating (Control) and TGF $\beta$ -treated (TGF $\beta$ ) Py2T cells merged with DAPI (blue). **j**, FURd, EdU and Ki67 (green) in Py2T, alone and merged with DAPI (blue). **k**, Immunostaining of E-cadherin (green) and Snail1 (green) in MCF7 cells under normoxia (Control) or 48-hour hypoxia (Hypoxia) merged with DAPI (blue). **l**, Immunostaining of rRNA synthesis (FURd, green) and DNA synthesis (EdU, green) in MCF7 cells under normoxia (Control) or 48-hour hypoxia (Hypoxia) merged with DAPI (blue). **m**, Immunostaining of rRNA synthesis (FURd, green) and DNA synthesis (EdU, red) over 27, 48, and 96 hours in proliferating (Control) and TGF $\beta$ -treated (TGF $\beta$ ) NMuMG cells. **n**, Quantification of E-cadherin (Ecad) and Vimentin time course images from (**m**) in proliferating (Control) and TGF $\beta$ - (TGF $\beta$ ) NMuMG cells.  $P < 0.05$ ,  $P < 0.02$ . Asterisk denotes t-test significance. Error bars  $\pm$  SE,  $n = 3$ . Scale bars = 50  $\mu$ m.

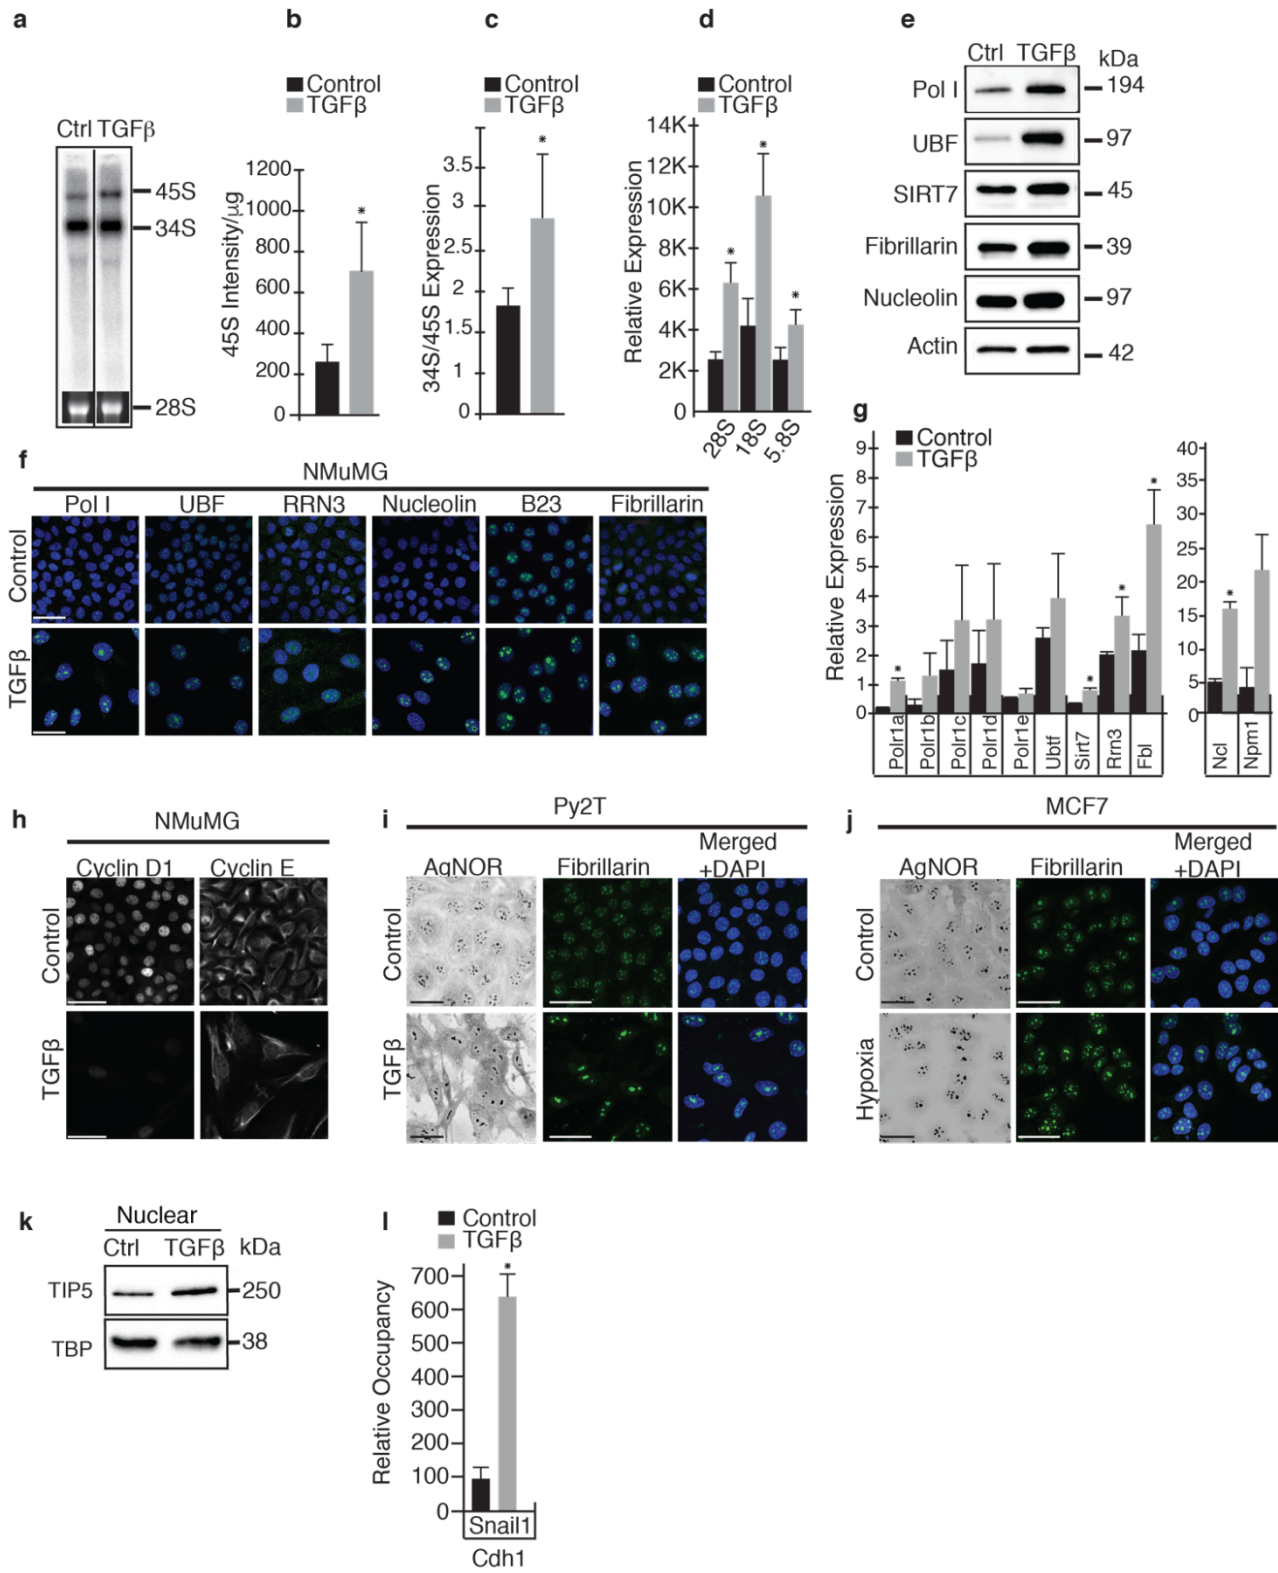

**Supplementary Figure 2. Characteristic features of the EMT-associated ribosome biogenesis program.** **a**, Representative Northern blot of NMuMG cells  $\pm$  TGF $\beta$ . **b**, Quantification of Northern blot



analysis of 45S expression in NMuMG cells  $\pm$  TGF $\beta$ . P<0.03. **c**, Quantification of Northern blot analysis of 34S/45S expression in NMuMG cells  $\pm$  TGF $\beta$ . P<0.04. **d**, qRT-PCR of 28S, 18S and 5.8S rRNA transcripts. P<0.01. **e**, Western Blot of Pol I, UBF, SIRT7, Fibrillarin and Nucleolin in NMuMG cells  $\pm$  TGF $\beta$ . Actin serves as a loading control. **f**. Pol I, UBF, RRN3, Nucleolin, B23, and Fibrillarin (all green) immunostaining in NMuMG  $\pm$  TGF $\beta$ , merged with DAPI (blue). **g**, qRT-PCR analysis of Pol I subunits (Polr1a-e), UBF (Ubtf), Sirt7, Rrn3, Fibrillarin (Fbl), Nucleolin (Ncl), and B23 (Npm1)  $\pm$  TGF $\beta$ , NMuMG cells, P<0.01 for Polr1a, Sirt7, Rrn3, Fbl, and Ncl. Error bars  $\pm$  SD, n=3 biological replicates. **h**, Immunostaining of Cyclin D1 and E (white)  $\pm$  TGF $\beta$ , NMuMG cells. **i**, Silver staining of nucleolar organizer regions (NORs) and Fibrillarin expression (green)  $\pm$  TGF $\beta$ , merged with DAPI (blue) in Py2T cells. **j**, Silver staining of nucleolar organizer regions (NORs), immunostaining of Fibrillarin (green) in MCF7 cells  $\pm$  hypoxia, merged with DAPI (blue). **k**, Western blot of TIP5 nuclear expression levels in NMuMG cells  $\pm$  TGF $\beta$ . TBP serves as a loading control. **l**, Snail1 binding to the E-cadherin (Cdh1) promoter, P<0.0002. Error bars  $\pm$  SE, n= 3. Asterisk denotes t-test significance. Scale bars = 50  $\mu$ m.

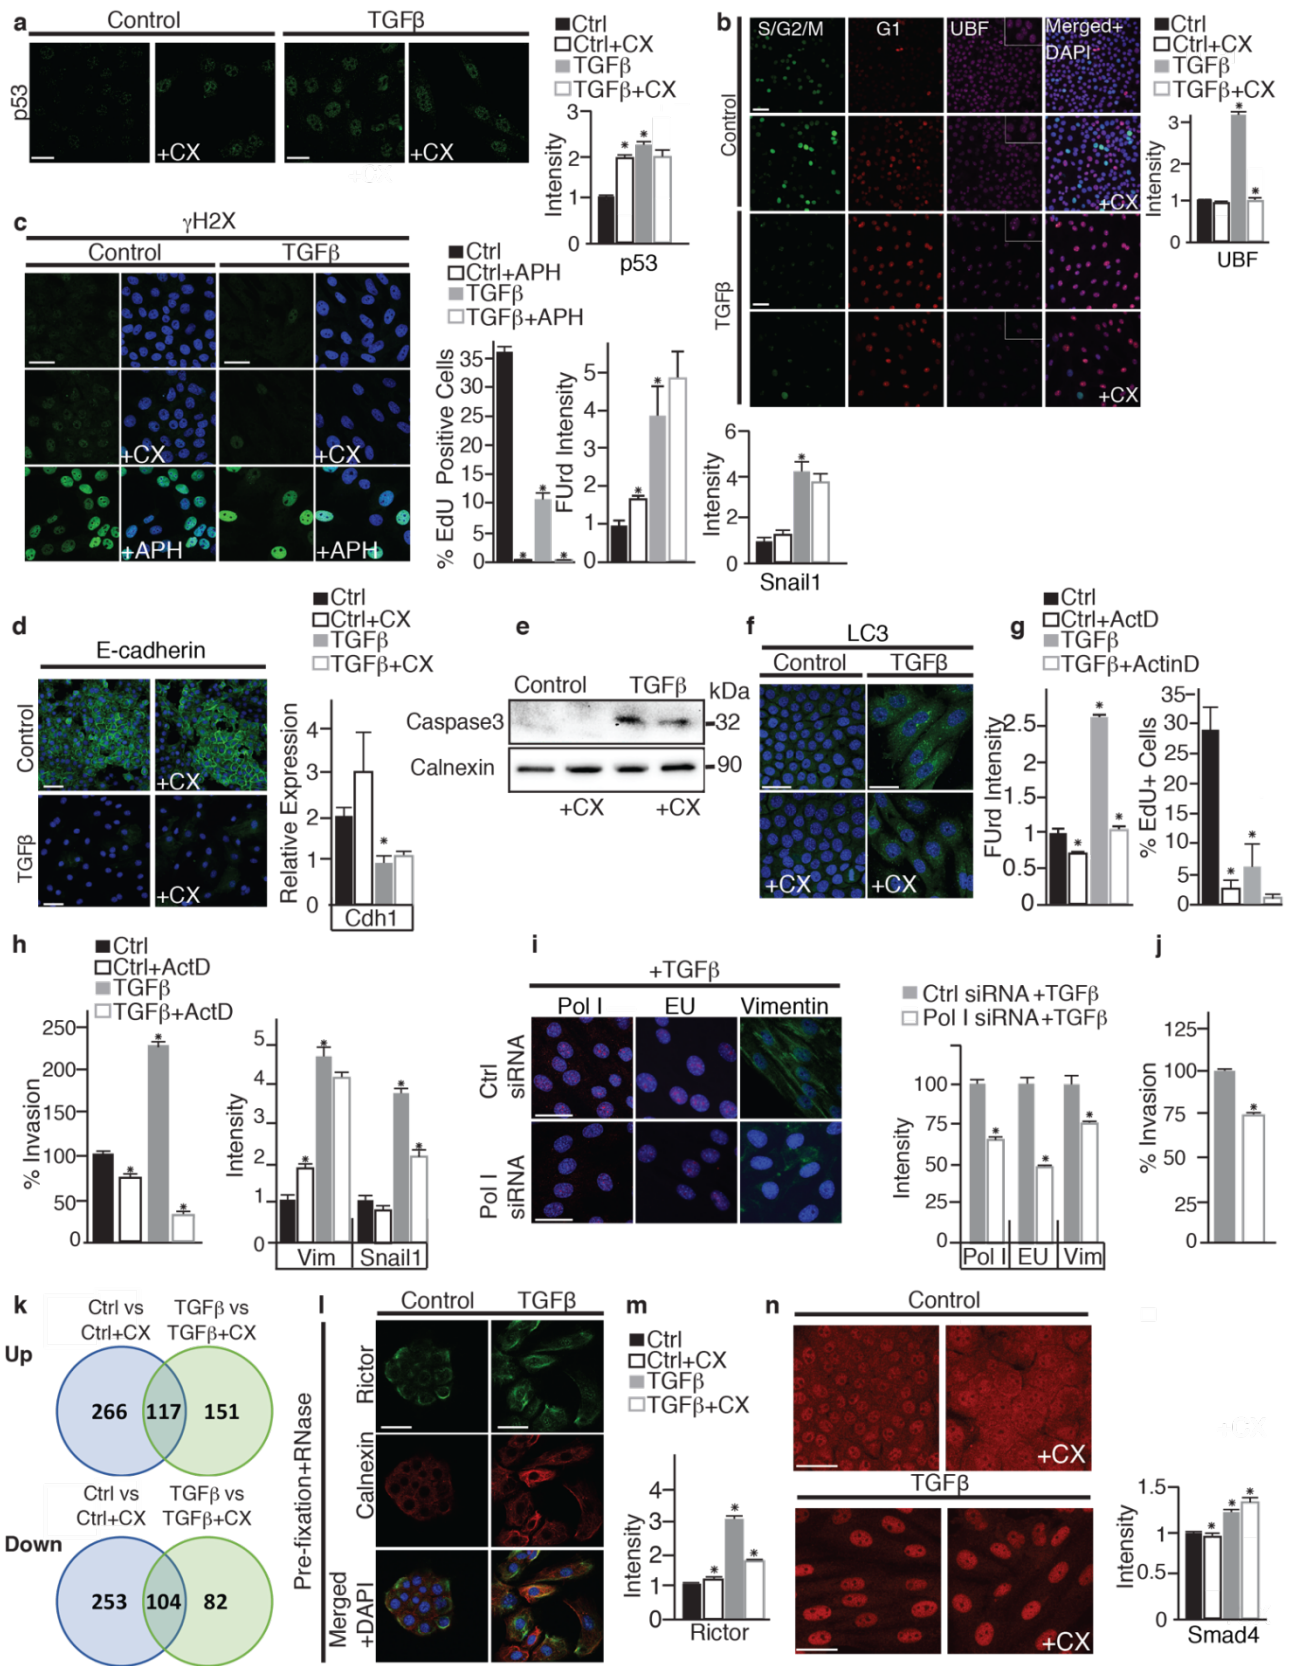

**Supplementary Figure 3. Inhibition of Pol I initiation at rDNA operons impairs the EMT program.**

All cell culture experiments performed in NMuMG, TGFβ, CX-5461, Actinomycin D (ActD) and

Aphidicolin (APH) labeled in each panel. **a**, p53 expression. Quantification of p53, Control/TGF $\beta$   $\pm$  CX-5461 treatment,  $P < 0.0001$  **b**, Cell cycle analysis using FUCCI system, S/G2/M (geminin, green), G1 (Cdt1, red), UBF (magenta) and DAPI (blue), merged. Quantification of UBF, Control/TGF $\beta$   $\pm$  CX-5461 treatment,  $P < 0.0001$  **c**,  $\gamma$ H2X staining (green) with DAPI (blue)  $\pm$  APH/CX-5461 treatment (blue). Quantification of EdU  $\pm$  APH treatment,  $P < 0.002$ . Quantification of FUrd and Snail  $\pm$  APH treatment,  $P < 0.01$ . **d**, E-cadherin (green) immunostaining with treatment, merged with DAPI (blue). qRT-PCR of E-cadherin (Cdh1) mRNA expression changes with treatment,  $P < 0.02$ . **e**, Cleaved Caspase-3 Western Blot. Calnexin serves as a loading control. **f**, LC3 (green) immunostaining merged with DAPI (blue). **g**, Quantification of FUrd and EdU post ActD treatment,  $P < 0.02$ ,  $P < 0.001$ . **h**, Relative percent invasion from Boyden chamber invasion assay with ActD treatment.  $P < \text{Control/control+ActD}$ ,  $P < 0.003$ ,  $\text{Control/TGF}\beta + \text{ActD}$ ,  $P < 0.001$  Quantification of ActD treated Vimentin and Snail1 (green) immunofluorescence.  $P < 0.03$ . **i**, Immunostaining of Pol I, EU and Vimentin transfected with Pol I siRNA or Ctrl siRNA in the presence of TGF $\beta$ . Quantification of Pol I, EU and Vimentin (Vim) intensity with Pol siRNA or Ctrl siRNA in the presence of TGF $\beta$ .  $P < 0.0002$ . **j**, Relative percent invasion from Boyden chamber invasion assay, with Pol I RNAi or Ctrl siRNA in the presence of TGF $\beta$ ,  $P < 0.0001$ . **k**, Venn diagram depicting the overlap of genes upregulated by CX-5461 in proliferating (Control) or TGF $\beta$ -treated NMuMG cells. Venn diagram depicting the overlap of genes downregulated by CX-5461 in proliferating (Control) or TGF $\beta$ -treated NMuMG cells. **l**, Immunostaining of Rictor (green) and Calnexin (green)  $\pm$  RNase A (RNase). **m**, Quantification of Rictor in NMuMG cells  $\pm$  TGF $\beta$   $\pm$  CX-5461  $P < 0.0001$  control compared to (TGF $\beta$  and TGF $\beta$  compared to (TGF $\beta$ +CX-5461). **n**, Immunostaining of Smad4 (green). Quantification of Smad4, Control/TGF $\beta$   $\pm$  CX-5461 treatment,  $P < 0.0001$ . For all quantifications: asterisk denotes t-test significance, error bars  $\pm$  SE,  $n = 3$ . Scale bars = 50  $\mu\text{m}$ .

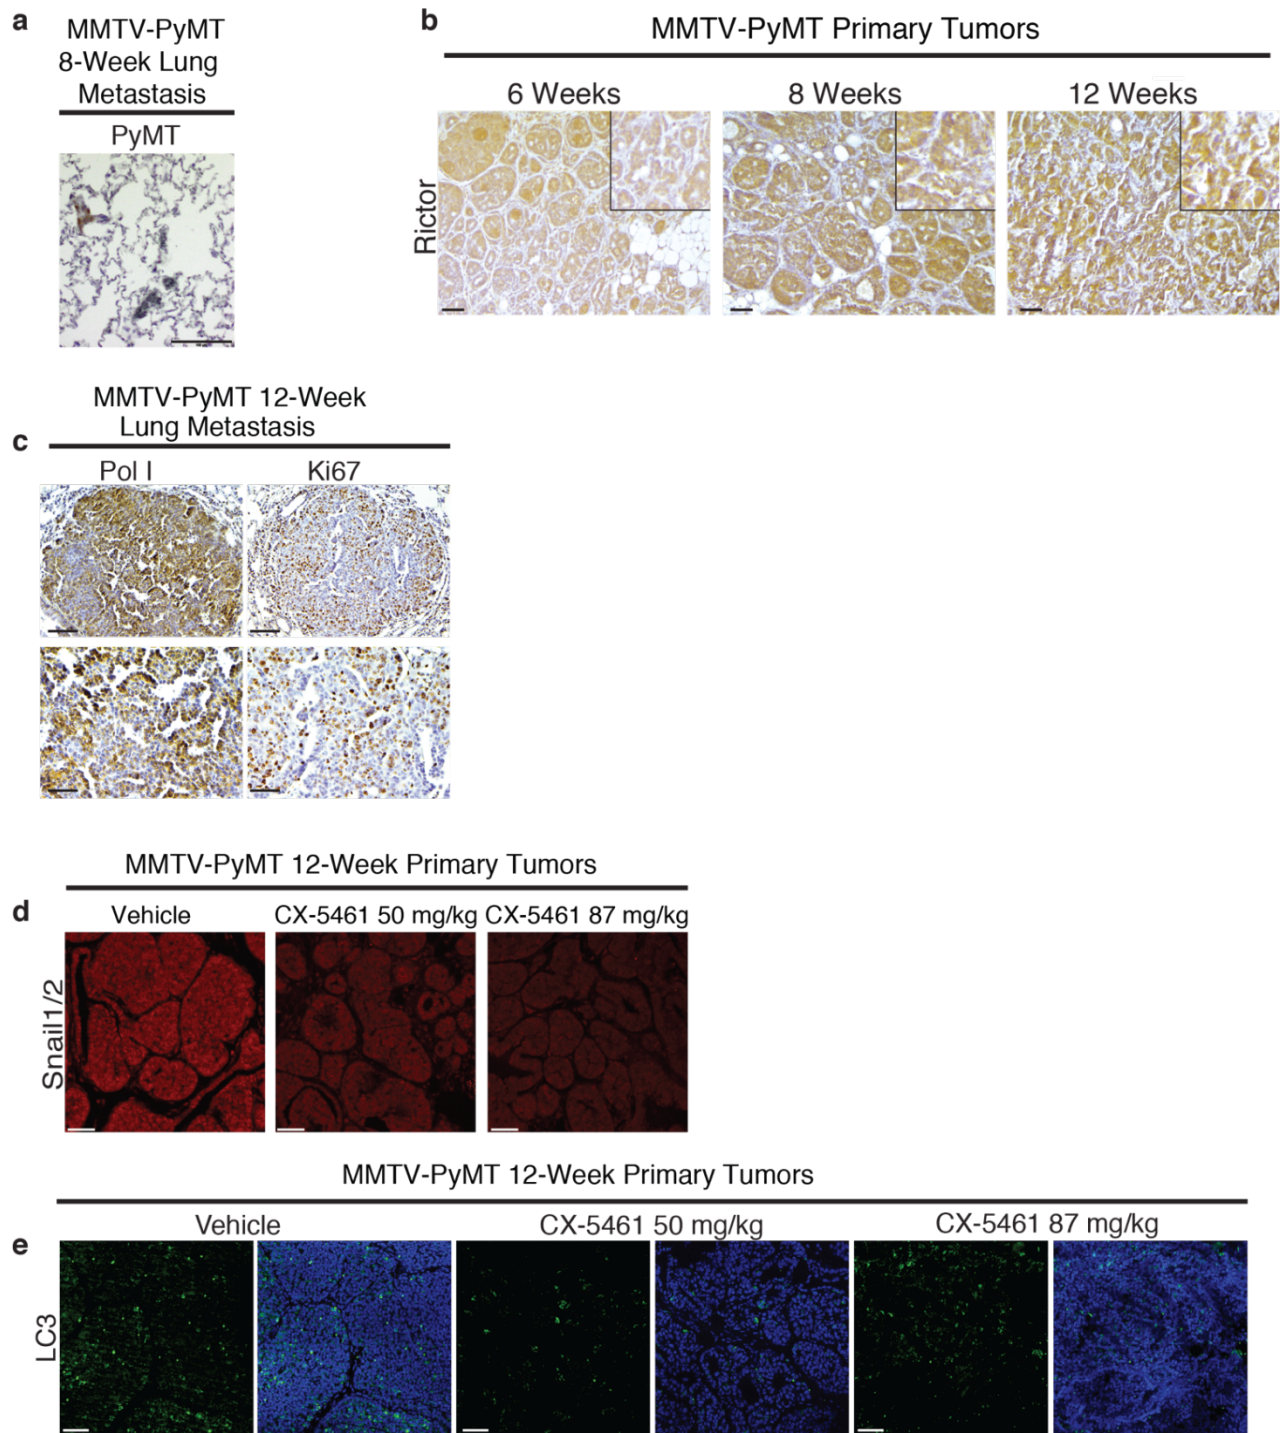

**Supplementary Figure 4. Human breast tumors exhibit high-levels of Pol I expression.** **a**, IHC staining for PyMT lung micro-metastasis, 8 weeks. **b**, IHC staining of Rictor expression in primary tumor for at 6, 8 and 12 weeks. **c**, IHC staining of 12-week lung metastasis for Pol I and Ki67 expression. **d**, Immunostaining of Snail1/2 (red) in vehicle, 50 mg/kg, or 87 mg/kg CX-5461-treated tumor. **e**, Immunostaining of LC3 (green) in vehicle, 50 mg/kg or 87 mg/kg CX-5461 treated tumors, DAPI (blue).

**Supplementary Table 1**  
**Antibody List**

| <b>Antibody</b>         | <b>Order information</b>           | <b>Fixation Solution/Time<br/>Immunofluorescence</b> | <b>IF/IHC<br/>Dilution</b> | <b>Western Blot<br/>Dilution</b> | <b>ChIP<br/>Dilution</b> |
|-------------------------|------------------------------------|------------------------------------------------------|----------------------------|----------------------------------|--------------------------|
| B23                     | Santa Cruz SC-271737               | 4% Paraformaldehyde, 15 minutes                      | 1:25                       |                                  |                          |
| Beta Actin              | Abcam ab1801                       |                                                      |                            | 1:1000                           |                          |
| BrdU 405                | Novusbio NBP2-34784AF405           |                                                      | 1:1000                     |                                  |                          |
| BrdU                    | Sigma Aldrich B2531 Clone BU33     | 4% Paraformaldehyde, 15 minutes                      | 1:1000                     |                                  |                          |
| Calnexin                | Abcam ab75801                      |                                                      |                            | 1:1000                           |                          |
| Calnexin                | Abcam ab22595                      | 4% Paraformaldehyde, 15 minutes                      | 1:150                      |                                  |                          |
| CAR1                    | gift of Jonas Fuxe Lab             | Ethanol, 10 minutes                                  | 1:1000                     |                                  |                          |
| Cleaved Caspase 3       | Cell Signalling 9661               |                                                      |                            | 1:1000                           |                          |
| Cytokeratin 8+18        | Abcam ab53280                      |                                                      | 1:100                      |                                  |                          |
| E-cadherin              | BD Transduction Labs 610182        | Ethanol, 10 minutes                                  | 1:100                      | 1:300                            |                          |
| Estrogen Receptor alpha | Abcam ab32063                      |                                                      | 1:250                      |                                  |                          |
| Fibrillarlin            | Abcam ab5821                       | 4% Paraformaldehyde, 15 minutes                      | 1:1000                     | 1:1000                           |                          |
| H3K4Me3                 | Abcam ab8580                       |                                                      |                            |                                  | 1:40                     |
| H3k27AC                 | Abcam ab4729                       |                                                      |                            |                                  | 1:40                     |
| IgG for ChIP            | Abcam ab46540                      |                                                      |                            |                                  | 1:400                    |
| Ki67                    | Thermo Scientific RM-9106S1        | 4% Paraformaldehyde, 15 minutes                      | 1:1000                     |                                  |                          |
| LC3                     | MBL International                  | 4% Paraformaldehyde, 15 minutes                      | 1:1000                     | 1:1000                           |                          |
| N-cadherin              | Abcam ab18203                      | Methanol, 20 seconds                                 | 1:1000                     |                                  |                          |
| N-cadherin              | Abcam ab12221                      |                                                      |                            | 1:200                            |                          |
| Nucleolin               | Abcam ab22758                      | 4% Paraformaldehyde, 15 minutes                      | 1:200                      | 1:300                            |                          |
| Phalloidin              | Life technologies A22287           | 4% Paraformaldehyde, 15 minutes                      | 1:40                       |                                  |                          |
| Pol 1_serum             | gift of Piergiorgio Percipalle Lab |                                                      |                            | 1:300                            | 1:500                    |
| Polr1e                  | Atlas Antibodies HPA022527         |                                                      | IHC 1:500                  |                                  |                          |
| p53                     | Santa Cruz SC-126                  | 4% Paraformaldehyde, 15 minutes                      | 1:50                       |                                  |                          |
| RICTOR antibody [7B3]   | Abcam ab104838                     | 4% Paraformaldehyde, 15 minutes                      | 1:150                      |                                  |                          |
| RPA194                  | Abcam ab48385                      | 4% Paraformaldehyde, 15 minutes                      | 1:25                       |                                  |                          |
| RRN3                    | Abcam ab169511                     | 4% Paraformaldehyde, 15 minutes                      | 1:25                       |                                  |                          |
| Sirt7                   | Abcam ab62748                      |                                                      |                            | 1:200                            | 1:40                     |
| Smad 4                  | Santa Cruz B-8 SC-81417            | 4% Paraformaldehyde, 15 minutes                      | 1:25                       | 1:50                             |                          |
| Snail 1                 | gift from Garcia de Herrero lab    | 4% Paraformaldehyde, 15 minutes                      | undiluted                  |                                  |                          |
| Snail1/2                | Abcam ab85936                      | 4% Paraformaldehyde, chick 1hr                       | 1:100                      |                                  |                          |
| SNAI 1 (H-130)          | Santa Cruz SC-28199                |                                                      |                            |                                  | 1:27                     |
| Sox10                   | Novusbio AF2864                    |                                                      | 1:500                      |                                  |                          |
| TBP                     | Abcam ab51841                      |                                                      |                            | 1:1000                           |                          |
| TIP5                    | Life technologies 49-1037          |                                                      |                            | 1:1000                           | 1:25                     |
| TIP5                    | Diagenode C15310090                |                                                      |                            | 1:1000                           |                          |
| UBF                     | Santa Cruz F-9 13125               | 4% Paraformaldehyde, 15 minutes                      | 1:100                      | 1:300                            |                          |
| UBF                     | Santa Cruz H-300, 9131             |                                                      |                            |                                  | 1:40                     |
| Vimentin                | Abcam ab45939                      | Methanol, 20 seconds                                 | 1:1000                     | 1:200                            |                          |



## Supplementary Table 2

### Primer List

| RT-PCR                          |                     |                        |                          |
|---------------------------------|---------------------|------------------------|--------------------------|
| protein                         | gene                | Forward                | Reverse                  |
| Car                             | Cxadr               | ccctggggtgcaataag      | gatccatccacgaagcatct     |
| E-cadherin                      | Cdh1                | atcctcgccctgctgatt     | accaccgttctcctccgta      |
| Fibrillarin                     | Fbl                 | aggaggatgccctgtcac     | gggtccaggctctgtactcaa    |
| Gapdh                           | Gapdh               | gtatgactccactcacggcaaa | gggtctcgctctggaagatg     |
| N-cadherin                      | Cdh2                | gccatcatcgctatcctct    | ccgttcatcataccacaaa      |
| Nucleolin                       | Ncl                 | catggtgaagctgcgaaaag   | tactatcctcttccactcctt    |
| Nucleophosmin                   | Npm1                | gaaaaaggcggttctcttcc   | ttctcctcactgccagagat     |
| Vimentin                        | Vim                 | tgcgccagcagatgaaa      | gcctcagagaggtcagcaaa     |
| PolI A                          | Polr1a              | cgttcatcgaggactaccagt  | tcttcatcagtgaggagcttca   |
| PolI B                          | Polr1b              | atggcgacccttactacagc   | gttgtccacaacacagtttcttta |
| PolI C                          | Polr1c              | cggtactacgccggttatg    | atttgcaccacgtccacac      |
| PolI D                          | Polr1d              | agcgccacctgaggattt     | ttgaggttctaatcctgatattt  |
| PolI E                          | Polr1e              | gaaaggtcacatcggaagaca  | gggcagagacttcagcattt     |
| Rrn3                            | rrn3                | gcctctgccatgtacagtt    | caaaaatgcttctgcaaatcc    |
| Sirt7                           | Sirt7               | tgatcatgcaactctcatgaat | ggtcgccaaggagaagatt      |
| Smad4                           | Smad4               | gagaacattggatggacgact  | cacagacgggcatagatcac     |
| Snail                           | Snai1               | cttgtgtctgcacgacctgt   | caggagaatggcttctcacc     |
| Ubf                             | Ubtf                | tactagcaccactgtctc     | gcttctcgttcatttcca       |
| Rictor                          | Rictor              | tgcgatattggccatagtga   | accggtctgtcttacttct      |
|                                 | rRNA                | Forward                | Reverse                  |
|                                 | 45S rRNA (pre-rRNA) | gcttgttctcccgattgc     | cgcaacaactgagaaaagt      |
|                                 | 28S rRNA            | agtcgggttgcttgggaatgc  | cccttacggctactgttgact    |
|                                 | 18S rRNA            | cggctaccacatccaagg     | tacaggcctcgaagagtc       |
|                                 | 5.8S rRNA           | actcttagcgggtggatcactc | aagcgacgctcagacagg       |
| <b>Mouse Metastasis Studies</b> |                     | <b>Forward</b>         | <b>Reverse</b>           |
|                                 | mCherry             | ctcccacaacgacgactaca   | ctgtacagctcgtccatgc      |
|                                 | Beta-Actin          | tcttggcctcactgtccac    | gcaagtgttcttagcggac      |
| <b>ChIP</b>                     |                     | <b>Forward</b>         | <b>Reverse</b>           |
|                                 | rDNA promoter       | gacctgtcggcttatcagttc  | ccggacctcaaaggaacaac     |
|                                 | 18S                 | cggctaccacatccaagg     | tacaggcctcgaagagtc       |
|                                 | 28S                 | agtcgggttgcttgggaatgc  | cccttacggctactgttgact    |
|                                 | E-cadherin promoter | agacaggggtggaggaagtt   | accagtgagcagcgcagag      |
