# Supplementary material for: Ribosome biogenesis during cell cycle arrest fuels EMT in development and disease
Source: PubMed Central journal article supplement (PMC6506521; doi:10.1038/s41467-019-10100-8), 2019-05-08
Supplement: 41467_2019_10100_MOESM2_ESM.pdf [file 41467_2019_10100_MOESM2_ESM.pdf]

## Reporting Summary

Nature Research wishes to improve the reproducibility of the work that we publish. This form provides structure for consistency and transparency in reporting. For further information on Nature Research policies, see [Authors & Referees](#) and the [Editorial Policy Checklist](#).

### Statistics

For all statistical analyses, confirm that the following items are present in the figure legend, table legend, main text, or Methods section.

n/a Confirmed

- The exact sample size ( $n$ ) for each experimental group/condition, given as a discrete number and unit of measurement
- A statement on whether measurements were taken from distinct samples or whether the same sample was measured repeatedly
- The statistical test(s) used AND whether they are one- or two-sided  
*Only common tests should be described solely by name; describe more complex techniques in the Methods section.*
- A description of all covariates tested
- A description of any assumptions or corrections, such as tests of normality and adjustment for multiple comparisons
- A full description of the statistical parameters including central tendency (e.g. means) or other basic estimates (e.g. regression coefficient) AND variation (e.g. standard deviation) or associated estimates of uncertainty (e.g. confidence intervals)
- For null hypothesis testing, the test statistic (e.g.  $F$ ,  $t$ ,  $r$ ) with confidence intervals, effect sizes, degrees of freedom and  $P$  value noted  
*Give  $P$  values as exact values whenever suitable.*
- For Bayesian analysis, information on the choice of priors and Markov chain Monte Carlo settings
- For hierarchical and complex designs, identification of the appropriate level for tests and full reporting of outcomes
- Estimates of effect sizes (e.g. Cohen's  $d$ , Pearson's  $r$ ), indicating how they were calculated

*Our web collection on [statistics for biologists](#) contains articles on many of the points above.*

### Software and code

Policy information about [availability of computer code](#)

Data collection

N/A

Data analysis

N/A

For manuscripts utilizing custom algorithms or software that are central to the research but not yet described in published literature, software must be made available to editors/reviewers. We strongly encourage code deposition in a community repository (e.g. GitHub). See the Nature Research [guidelines for submitting code & software](#) for further information.

### Data

Policy information about [availability of data](#)

All manuscripts must include a [data availability statement](#). This statement should provide the following information, where applicable:

- Accession codes, unique identifiers, or web links for publicly available datasets
- A list of figures that have associated raw data
- A description of any restrictions on data availability

All data will be made available upon request from the authors. The RNA sequencing data presented are available through the Sequence Read Archive BioProject: PRJNA531030.

### Field-specific reporting

Please select the one below that is the best fit for your research. If you are not sure, read the appropriate sections before making your selection.

- Life sciences       Behavioural & social sciences       Ecological, evolutionary & environmental sciences

## Life sciences study design

All studies must disclose on these points even when the disclosure is negative.

|                 |                                                                                                                                                                                                                    |
|-----------------|--------------------------------------------------------------------------------------------------------------------------------------------------------------------------------------------------------------------|
| Sample size     | Sample size was chosen by an estimate of the number of animals needed to detect a 30% difference in the primary endpoints (tumor growth rate and metastatic colonization), based on the experience of the authors. |
| Data exclusions | No data was excluded from the analysis                                                                                                                                                                             |
| Replication     | Each experiment was performed in three biological replicates.                                                                                                                                                      |
| Randomization   | No randomization was used                                                                                                                                                                                          |
| Blinding        | The investigator performing animal experiments was aware of which therapy was administered to each group.                                                                                                          |

## Reporting for specific materials, systems and methods

We require information from authors about some types of materials, experimental systems and methods used in many studies. Here, indicate whether each material, system or method listed is relevant to your study. If you are not sure if a list item applies to your research, read the appropriate section before selecting a response.

### Materials & experimental systems

| n/a                                 | Involvement in the study                                        |
|-------------------------------------|-----------------------------------------------------------------|
| <input type="checkbox"/>            | <input checked="" type="checkbox"/> Antibodies                  |
| <input type="checkbox"/>            | <input checked="" type="checkbox"/> Eukaryotic cell lines       |
| <input checked="" type="checkbox"/> | <input type="checkbox"/> Palaeontology                          |
| <input type="checkbox"/>            | <input checked="" type="checkbox"/> Animals and other organisms |
| <input type="checkbox"/>            | <input checked="" type="checkbox"/> Human research participants |
| <input checked="" type="checkbox"/> | <input type="checkbox"/> Clinical data                          |

### Methods

| n/a                                 | Involvement in the study                        |
|-------------------------------------|-------------------------------------------------|
| <input checked="" type="checkbox"/> | <input type="checkbox"/> ChIP-seq               |
| <input checked="" type="checkbox"/> | <input type="checkbox"/> Flow cytometry         |
| <input checked="" type="checkbox"/> | <input type="checkbox"/> MRI-based neuroimaging |

### Antibodies

|                 |                                                                             |
|-----------------|-----------------------------------------------------------------------------|
| Antibodies used | See Table 1.                                                                |
| Validation      | All antibodies used in this study are commercially available and validated. |

### Eukaryotic cell lines

Policy information about [cell lines](#)

|                                                                   |                                                                                 |
|-------------------------------------------------------------------|---------------------------------------------------------------------------------|
| Cell line source(s)                                               | Methods; ATCC, RIKEN BRC and collaborators                                      |
| Authentication                                                    | All cell lines were purchased from ATCC, RIKEN BRC or verified by collaborators |
| Mycoplasma contamination                                          | Cells were routinely tested for mycoplasma                                      |
| Commonly misidentified lines (See <a href="#">ICLAC</a> register) | N/A                                                                             |

### Animals and other organisms

Policy information about [studies involving animals](#); [ARRIVE guidelines](#) recommended for reporting animal research

|                         |                                                                                              |
|-------------------------|----------------------------------------------------------------------------------------------|
| Laboratory animals      | Methods. MMTV-PyMT (FVB/N), C57 BL/6                                                         |
| Wild animals            | N/A                                                                                          |
| Field-collected samples | N/A                                                                                          |
| Ethics oversight        | Methods; (Stockholm Norra, license# N96/11 and Lund, license# M142/13), #0709-666A, #1184203 |

Note that full information on the approval of the study protocol must also be provided in the manuscript.

## Human research participants

---

Policy information about [studies involving human research participants](#)

|                            |                                                                                                             |
|----------------------------|-------------------------------------------------------------------------------------------------------------|
| Population characteristics | N/A                                                                                                         |
| Recruitment                | N/A                                                                                                         |
| Ethics oversight           | Methods; The "Ethics Committee at the Karolinska Institutet", Stockholm and the "Stockholm Medical Biobank" |

Note that full information on the approval of the study protocol must also be provided in the manuscript.
